# Supplementary material
Source: Springer Nature journal article supplement (https://www.springermedizin.de/resource/supplementary/13046_2009_242_MOESM2_ESM.pdf/9661622)
Supplement: MOESM2 [file 9661622]

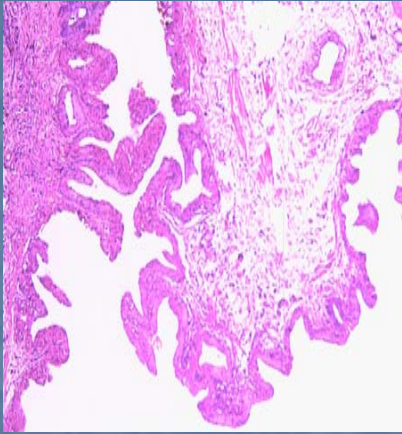

normal  
Saline-group:  
HE×100

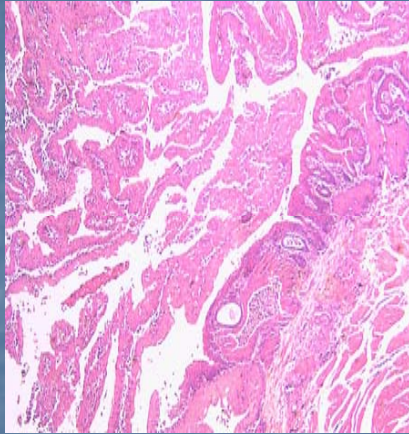

empty placid baby-  
Bifidobacte-rium group  
HE×100

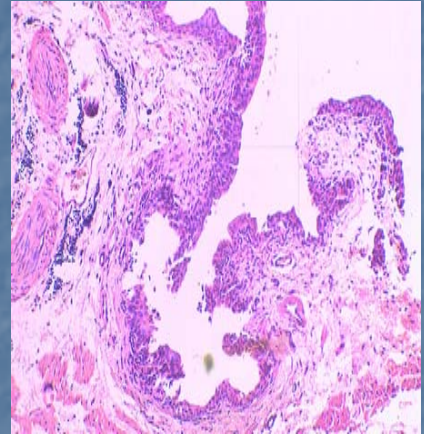

Recombinant  
Plasid baby  
Bifidobacterium group  
HE×100
